# Supplementary material
Source: PubMed Central journal article supplement (PMC7722200)
Supplement: NIHMS1624493-supplement-Table_S1_and_S2.pdf [file NIHMS1624493-supplement-Table_S1_and_S2.pdf]

| <b>Supplementary Table S1. Reasons for Not Returning the Consent Form</b>                                                                                            |                     |                |              |
|----------------------------------------------------------------------------------------------------------------------------------------------------------------------|---------------------|----------------|--------------|
|                                                                                                                                                                      | <b>Intervention</b> | <b>Control</b> | <b>Total</b> |
| Patient declined due to concerns about providing consent (e.g. concerns about privacy and who would have access to data)                                             | 10                  | 2              | <b>12</b>    |
| Patient declined or was unavailable for pharmacist home visit (includes unavailable within study timeframe)                                                          | 13                  | N/A            | <b>13</b>    |
| Patient declined because of study arm assignment                                                                                                                     | 3                   | 1              | <b>4</b>     |
| Study staff unavailable to complete visit within study timeframe                                                                                                     | 5                   | N/A            | <b>5</b>     |
| Patient became unwilling or unable to participate because of life circumstances or health issues (too sick, too busy, moving, grieving)                              | 5                   | 7              | <b>12</b>    |
| Patient was unavailable or unable to consent due to <i>change</i> in situation or status (e.g. admitted to SNF, readmitted to hospital, cognitive impairment, death) | 2                   | 6              | <b>8</b>     |
| Patient or proxy declined to return form referring to no need for help with medications                                                                              | 2                   | 1              | <b>3</b>     |
| Other (unable to read consent form)                                                                                                                                  | 1                   | 0              | <b>1</b>     |
| No information available regarding reason for declining                                                                                                              | 9                   | 31             | <b>40</b>    |
| <b>Total</b>                                                                                                                                                         | <b>50</b>           | <b>48</b>      | <b>98</b>    |

| <b>Supplementary Table S2. Focus Group Reasons for Enrolling or Declining</b> |          |                                                                                                                                                                                                                                                                                                                        |
|-------------------------------------------------------------------------------|----------|------------------------------------------------------------------------------------------------------------------------------------------------------------------------------------------------------------------------------------------------------------------------------------------------------------------------|
| <b>Reasons for Declining</b>                                                  | <b>N</b> | <b>Quote</b>                                                                                                                                                                                                                                                                                                           |
| Felt too sick, tired, or in pain                                              | 11       | And I think I was just actually trying to blow you off. No. [Laughter] Because I felt so terrible. You know what I mean?                                                                                                                                                                                               |
| Timing/Intervention is too soon after hospitalization                         | 3        | Usually within a few days when you come home from the hospital everything's in turmoil and you're not necessarily thinking straight. And you really haven't formed any sort of an opinion because it's just too soon. You haven't got back to normal. It's like maybe you should wait a little bit.                    |
| VNA/Care from hospital                                                        | 6        | I had a visiting nurse, so why would I want someone else?                                                                                                                                                                                                                                                              |
| Have sufficient information                                                   | 2        | Yeah, oh, yeah. I'm pretty sure that's why. It was just more or less like, no, I'm okay, I know what I'm doing.                                                                                                                                                                                                        |
| Been taking same medications for a long time                                  | 3        | I mean if that was new medications right after you get out of the hospital, yes, but being on regular medications after surgery, immediately be on those meds right after surgery, right after you come home, and then I go back on my regular meds. When I went to the hospital this time I didn't have anything new. |

|                                             |          |                                                                                                                                                                                                                                                                                                                                                                                                                                                                                                      |
|---------------------------------------------|----------|------------------------------------------------------------------------------------------------------------------------------------------------------------------------------------------------------------------------------------------------------------------------------------------------------------------------------------------------------------------------------------------------------------------------------------------------------------------------------------------------------|
| Does not want to take part in research      | 1        | I just think that right when you come home the furthest thing from your mind is do you want to be part of a research group. So I think that you would get more places if maybe you didn't use that term.                                                                                                                                                                                                                                                                                             |
| Concerned about a scam/fraudulent           | 6        | That's the way of the world today. You don't know who's at the other end.                                                                                                                                                                                                                                                                                                                                                                                                                            |
| Other comments about not participating      | 1        | I'm not really a phone person. I'm a face-to-face.                                                                                                                                                                                                                                                                                                                                                                                                                                                   |
| <b>Reasons for Enrolling</b>                | <b>N</b> | <b>Quote</b>                                                                                                                                                                                                                                                                                                                                                                                                                                                                                         |
| Potential benefits (better care for others) | 6        | Like I said, too, before, if I get a call for a survey or for something like this, I'd go in a minute because I feel I'm paying back. I've been given so much that I'm starting to pay back.                                                                                                                                                                                                                                                                                                         |
| Potential benefits (better care for self)   | 5        | You can go back and say, this is what I learned here and I can now, if I have to do this again I've got ... I know where the help is, I know how to get the help, I know how to do all that. Because the visiting nurse came in and said she was going to get me a visiting nurse and I never saw one. Nobody came to my house. Nobody called. Nothing. I was shocked. I thought, they set it all up in the hospital, I'm all set.                                                                   |
| Wanted the company                          | 1        | What motivated me was I had just gotten out of the hospital with a life-changing situation and my medications, how are they going to affect me? What is going to be needed? And having a pharmacist come to the house, having someone to talk to at that particular moment, could have been a VNA, or whatever it is, anybody was just very calming to know that I'm on the right track with my medications. I don't see why anyone would say no. But then again ... yeah ... besides, it's company. |
| Other comments about participating          | 2        | I love to be part of it where my participation matters or it counts or my opinion, whatever.                                                                                                                                                                                                                                                                                                                                                                                                         |
